# Supplementary material for: The chromatin-remodeling factor CHD4 is required for maintenance of childhood acute myeloid leukemia
Source: PubMed Central journal article supplement — Haematologica. 2018 Mar 29;103(7):1169–81. doi: 10.3324/haematol.2017.183970 (PMC6029541; doi:10.3324/haematol.2017.183970), 2018-07
Supplement: 2017_183970-Disclosures_and_Contributions.pdf [file 2017_183970-Disclosures_and_Contributions.pdf]

Haematologica  
HAEMATOL/2017/183970  
Version 3

The chromatin-remodeling factor CHD4 is required for maintenance of  
childhood acute myeloid leukemia

Yaser Heshmati, Gözde Türköz, Aditya Harisankar, Shabnam Kharazi,  
Johan Boström, Esmat Kamali Dolatabadi, Aleksandra Krstic, David  
Chang, Robert Månsson, Mikael Altun, Hong Qian, and Julian  
Walfridsson

Disclosures: None

Contributions: Y.H. designed and performed experiments, analyzed data and wrote the manuscript. G.T. helped with cloning of vectors and cell growth assays. A.H. helped with analysis of RNA-Seq data and the shRNA screens. S.K. helped with the design, flow cytometry analysis and sorting of primary cells. J.B. cloned and designed the inducible gRNA and shRNA vectors. E.K.D optimized the conditions for maintenance of primary cells. A.K. established RNA-seq method, generated the RNA-seq libraries and analyzed data. D.C. helped with the CRISPR-Cas9 experiments. R.M. supervised establishment of RNAseq method, analyzed data and provided input. M.A. designed the gRNA and shRNA vectors and provided input in the project. H.Q. helped to design the studies, analysis of the experiment and supervision of Y.H.. J.W. Conceived the project, supervised the study, analyzed the data, interpreted result and wrote the manuscript. All authors participated in editing of the manuscript.
